# Supplementary material for: Evolution of inbreeding: a gaze into five Italian beef cattle breeds history
Source: PeerJ. 2021 Sep 27;9:e12049. doi: 10.7717/peerj.12049 (PMC8483007; doi:10.7717/peerj.12049)
Supplement: Supplemental Information 1 [file peerj-09-12049-s001.xlsx]

## Sheet: Foglio1
Table S1. Distribution of the number of young bulls per year and breed.
YEAR	MARCHIGIANA	CHIANINA	ROMAGNOLA	MAREMMANA	PODOLICA
1985-2002	43	44	51	4	12
2003	31	40	26	22	43
2004	31	41	22	28	0
2005	41	47	50	17	0
2006	55	60	58	16	0
2007	52	61	60	23	27
2008	64	60	60	21	41
2009	62	65	70	18	32
2010	61	72	71	12	42
2011	69	66	57	18	42
2012	53	41	60	31	37
2013	53	25	65	0	33
2014	38	31	45	20	38
2015	41	41	60	20	37
2016	44	35	31	20	36
2017	51	70	43	20	45
2018	66	72	56	24	46
2019	24	38	19	20	44
Total	879	909	904	334	555
