# Supplementary material for: Evolution of inbreeding: a gaze into five Italian beef cattle breeds history
Source: PeerJ. 2021 Sep 27;9:e12049. doi: 10.7717/peerj.12049 (PMC8483007; doi:10.7717/peerj.12049)
Supplement: Supplemental Information 2 [file peerj-09-12049-s002.xlsx]

## Sheet: Foglio1
Table S2. Number of autosomal SNPs and animals before (Pre) and after (Post) SNPs sample filtering per breed.
Breed	SNPs Pre-QC	SNPs Post-QC	Animals Pre-QC	Animals Post-QC
Marchigiana	28298	23447	879	798
Chianina	28298	21382	909	730
Romagnola	28298	21624	904	756
Maremmana	28298	23302	334	298
Podolica	28298	23953	555	449
